# Supplementary material
Source: Springer Nature journal article supplement (https://www.springermedizin.de/resource/supplementary/12891_2005_218_MOESM1_ESM.pdf/9510768)

**Baseline**

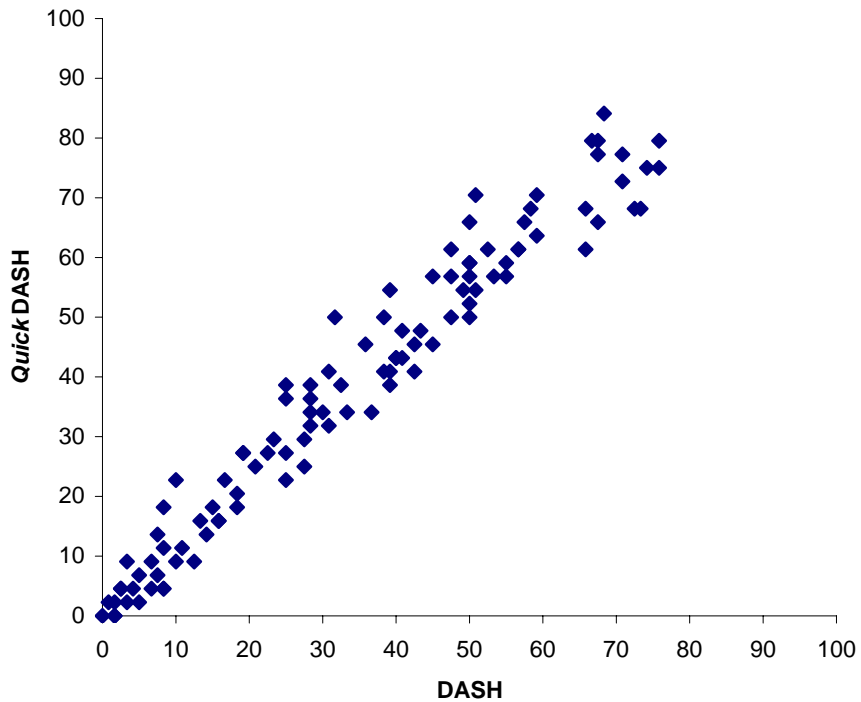

**Follow-up**

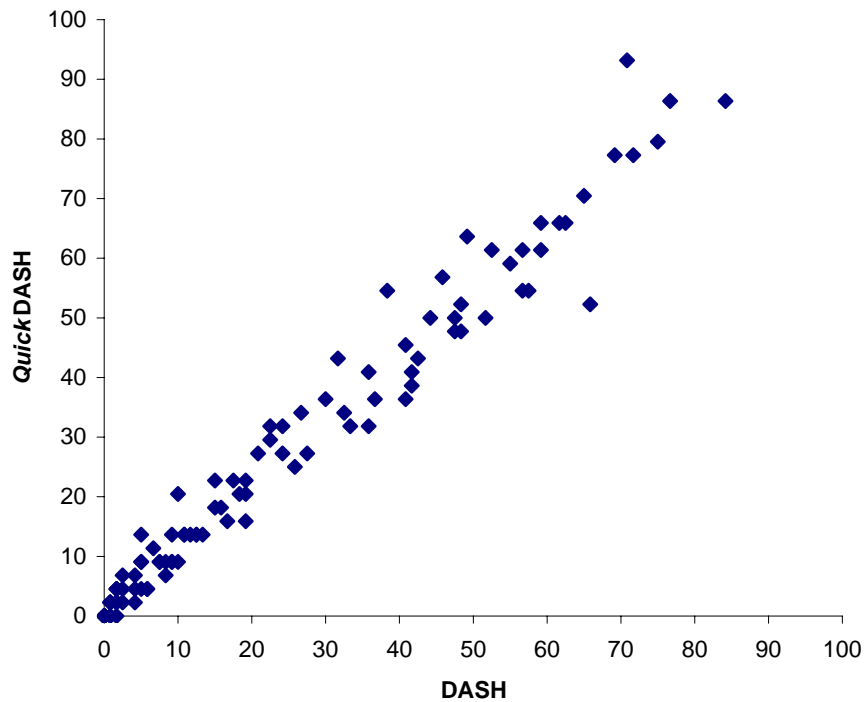

Supplement: MOESM1 [file 9510768]
